# Supplementary material for: Dye-sensitized solar cells with low-cost catalytic films of polymer-loaded carbon black on their counter electrode
Source: Royal Society of Chemistry journal article supplement (doi:10.1039/c3ra23428b), 2013-01-01
Supplement: c3ra23428b.pdf [file c3ra23428b.pdf]

# Electronic Supplementary information

## Dye-Sensitized Solar Cells with Low-Cost Catalytic Films of Polymer-Loaded Carbon Black on Their Counter Electrode

Ping-Wei Chen<sup>a</sup>, Chuan-Pei Lee<sup>a</sup>, Ling-Yu Chang<sup>b</sup>, Jeffery Chang<sup>a</sup>, Min-Hsin Yeh<sup>a</sup>,

Lu-Yin Lin<sup>a</sup>, R. Vittal<sup>a</sup>, Jiang-Jen Lin<sup>b\*</sup>, and Kuo-Chuan Ho<sup>a,b\*</sup>

<sup>a</sup>Department of Chemical Engineering, National Taiwan University, Taipei 10617, Taiwan

<sup>b</sup>Institute of Polymer Science and Engineering, National Taiwan University, Taipei 10617, Taiwan

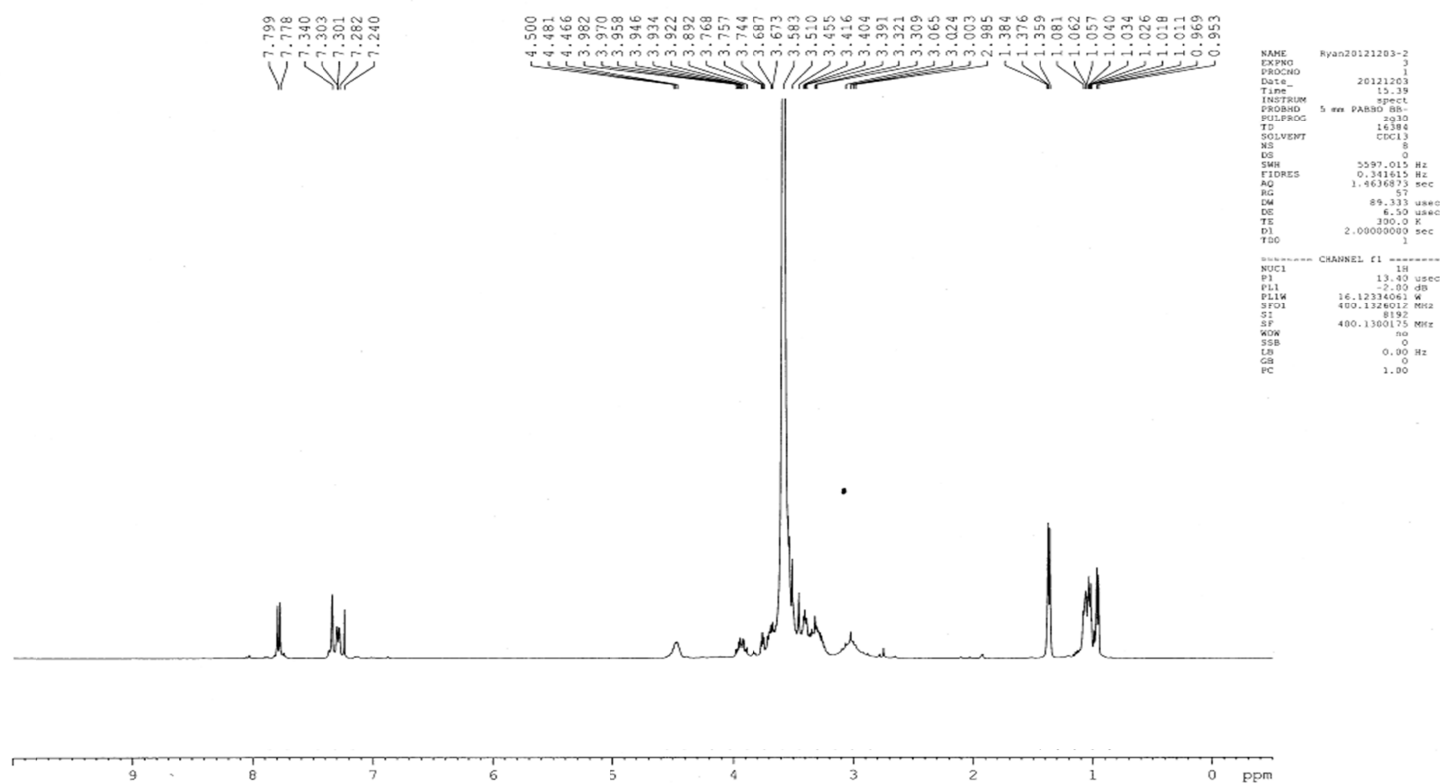

Figure S1: The <sup>1</sup>H NMR spectrum of POEM.

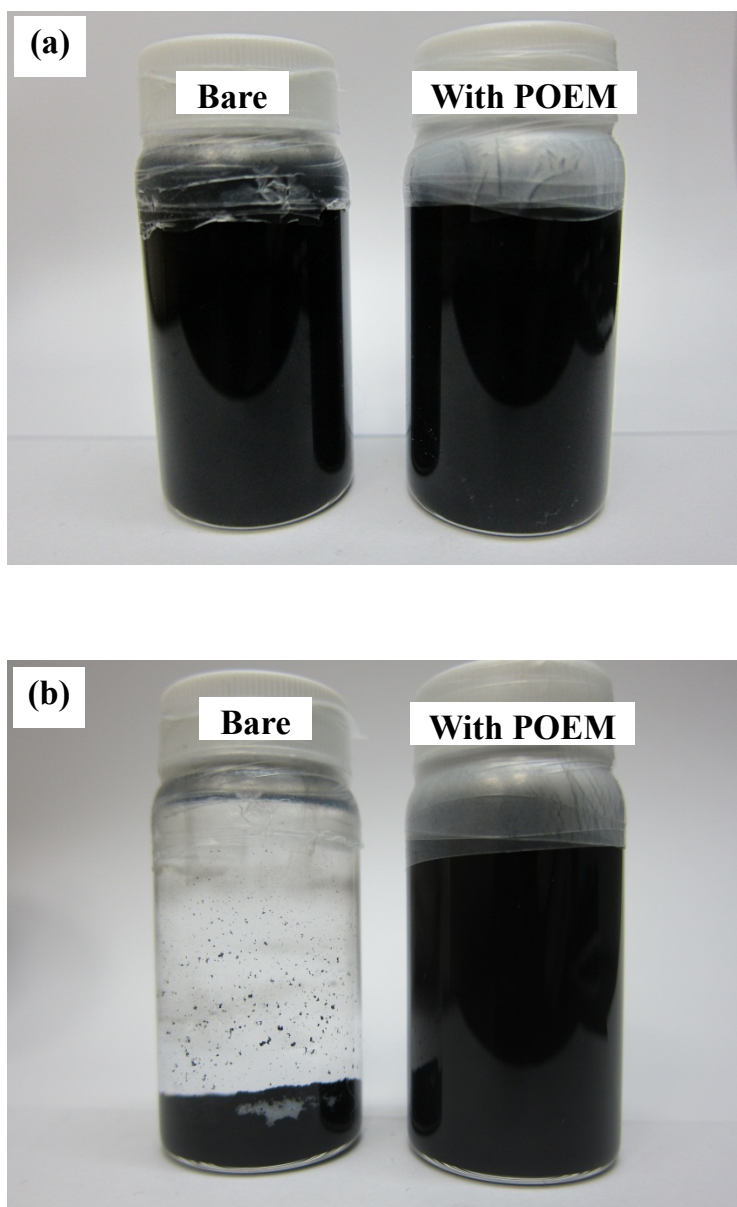

**Figure S2:** (a) Bare CB solution and CB solution with 5.0 wt% of POEM, at 0 h; (b) same as in (a) at 24 h.
